# Supplementary material
Source: PubMed Central journal article supplement (PMC3774260)
Supplement: tableS1.pdf [file tableS1.pdf]

**Supplementary Table 1: Correlative Analysis Between Expression of Priority 1 Proteins and Serum Lipid Parameters and Liver Enzymes**

|                           |   | Apolipoprotein C-III | Apolipoprotein E | Apolipoprotein E precursor | Orosomucoid 1    | Apolipoprotein B | Serum amyloid P component | Secreted folate binding protein | Transthyretin | Folate receptor 1 | Endopeptidase 24.16 type M2 |
|---------------------------|---|----------------------|------------------|----------------------------|------------------|------------------|---------------------------|---------------------------------|---------------|-------------------|-----------------------------|
| Total Cholesterol (mg/dl) | r | 0.912                | <b>0.912</b>     | 0.002                      | <b>0.9</b>       | 0.446            | 0.907                     | 0.907                           | 0.343         | 0.836             | 0.422                       |
|                           | p | <0.001               | <b>&lt;0.001</b> | 0.993                      | <b>&lt;0.001</b> | 0.073            | <0.001                    | <0.001                          | 0.178         | <0.001            | 0.092                       |
| LDL Cholesterol (mg/dl)   | r | 0.882                | <b>0.882</b>     | -0.002                     | <b>0.873</b>     | 0.311            | 0.887                     | 0.887                           | 0.24          | 0.782             | 0.314                       |
|                           | p | <0.001               | <b>&lt;0.001</b> | 0.993                      | <b>&lt;0.001</b> | 0.224            | <0.001                    | <0.001                          | 0.353         | <0.001            | 0.22                        |
| HDL Cholesterol (mg/dl)   | r | 0.765                | 0.765            | -0.103                     | 0.777            | 0.515            | 0.767                     | 0.767                           | 0.265         | 0.62              | 0.267                       |
|                           | p | <0.001               | <0.001           | 0.694                      | <0.001           | 0.035            | <0.001                    | <0.001                          | 0.305         | 0.008             | 0.3                         |
| Triglycerides (mg/dl)     | r | 0.816                | 0.816            | -0.02                      | 0.772            | 0.255            | 0.821                     | 0.821                           | 0.26          | 0.73              | 0.365                       |
|                           | p | <0.001               | <0.001           | 0.94                       | <0.001           | 0.323            | <0.001                    | <0.001                          | 0.314         | 0.001             | 0.149                       |
| AST (U/L)                 | r | 0.594                | 0.592            | 0.157                      | 0.582            | 0.237            | 0.548                     | <b>0.548</b>                    | 0.293         | 0.602             | 0.334                       |
|                           | p | 0.009                | 0.01             | 0.534                      | 0.011            | 0.343            | 0.018                     | <b>0.018</b>                    | 0.238         | 0.008             | 0.176                       |
| ALP (U/L)                 | r | 0.554                | 0.544            | -0.42                      | 0.573            | 0.009            | 0.56                      | 0.56                            | -0.046        | <b>0.48</b>       | -0.001                      |
|                           | p | 0.017                | 0.02             | 0.083                      | 0.013            | 0.971            | 0.016                     | 0.016                           | 0.855         | <b>0.044</b>      | 0.997                       |

|                           |   | Ovarian and testicular apolipoprotein N | Paraoxonase 1 | Similar to $\alpha$ -2-macroglobulin precursor | $\beta$ -2-microglobulin | Retinoic acid-induced 14 | Complement component 2 | Fumarate hydratase | p101 protein | Carboxypeptidase B2 (plasma) | Complement component C8G |
|---------------------------|---|-----------------------------------------|---------------|------------------------------------------------|--------------------------|--------------------------|------------------------|--------------------|--------------|------------------------------|--------------------------|
| Total Cholesterol (mg/dl) | r | 0.672                                   | 0.757         | 0.784                                          | 0.779                    | 0.279                    | 0.554                  | 0.75               | 0.324        | 0.853                        | 0.561                    |
|                           | p | 0.003                                   | <0.001        | <0.001                                         | <0.001                   | 0.277                    | 0.021                  | 0.001              | 0.205        | <0.001                       | 0.019                    |
| LDL Cholesterol (mg/dl)   | r | 0.591                                   | 0.662         | 0.738                                          | 0.733                    | 0.157                    | 0.483                  | 0.657              | 0.225        | 0.816                        | 0.456                    |
|                           | p | 0.013                                   | 0.004         | 0.001                                          | 0.001                    | 0.548                    | 0.05                   | 0.004              | 0.384        | <0.001                       | 0.066                    |
| HDL Cholesterol (mg/dl)   | r | 0.564                                   | 0.659         | 0.539                                          | 0.525                    | 0.289                    | 0.377                  | 0.637              | 0.409        | <b>0.833</b>                 | 0.608                    |
|                           | p | 0.018                                   | 0.004         | 0.026                                          | 0.031                    | 0.26                     | 0.135                  | 0.006              | 0.103        | <b>&lt;0.001</b>             | 0.01                     |
| Triglycerides (mg/dl)     | r | 0.576                                   | 0.61          | 0.701                                          | <b>0.76</b>              | 0.255                    | 0.51                   | 0.615              | 0.186        | 0.708                        | 0.375                    |
|                           | p | 0.016                                   | 0.009         | 0.002                                          | <b>&lt;0.001</b>         | 0.323                    | 0.037                  | 0.009              | 0.474        | 0.001                        | 0.138                    |
| AST (U/L)                 | r | 0.367                                   | 0.496         | 0.552                                          | 0.539                    | -0.104                   | 0.558                  | 0.491              | -0.018       | 0.529                        | 0.279                    |
|                           | p | 0.135                                   | 0.036         | 0.017                                          | 0.021                    | 0.68                     | 0.016                  | 0.038              | 0.945        | 0.024                        | 0.263                    |
| ALP (U/L)                 | r | 0.176                                   | 0.255         | 0.356                                          | 0.222                    | -0.119                   | 0.075                  | 0.209              | 0.139        | 0.342                        | 0.181                    |
|                           | p | 0.484                                   | 0.307         | 0.147                                          | 0.376                    | 0.639                    | 0.766                  | 0.404              | 0.581        | 0.165                        | 0.473                    |

Abbreviations: LDL; low-density lipoprotein, HDL; high-density lipoprotein, AST; aspartate aminotransferase, ALP; alkaline phosphatase.

Shading represents a significant relationship as assessed by Spearman's rank correlation.

Bold text represents independent predictors of lipid values and liver enzymes upon stepwise regression analysis.
